# Supplementary material for: Pilot Feasibility Assessment of a Tailored Physical Activity Prescription in Overweight and Obese People in a Public Hospital
Source: MDPI journal article supplement (doi:10.3390/ijerph191710774), 2022-08-30
Supplement: s1 [file s1]

**Table S2.** Primary and secondary clinical outcomes at baseline, sixth and twelfth weeks

| Outcome measures                              | Baseline<br>(n=30) | Follow-up<br>6th week<br>(n=11) | Final evaluation<br>12th week<br>(n=21) |
|-----------------------------------------------|--------------------|---------------------------------|-----------------------------------------|
| <b>Primary</b>                                |                    |                                 |                                         |
| Physical Activity (MET-min/week) <sup>1</sup> |                    |                                 |                                         |
| Walking                                       | 1386 (2541.0)      | 1097.3 (1270.5)                 | 2079 (3234)                             |
| Moderate Intensity                            | 1305 (2430.0)      | 900 (1140.0)                    | 2520 (3520)                             |
| Vigorous Intensity                            | 0 0                | 1440 (2400)                     | 0 (960)                                 |
| Sitting time (hours/day) <sup>1</sup>         | 3 (3)              | 4 (2)                           | 3 (3.3)                                 |
| Six minutes' walk test <sup>1</sup>           |                    |                                 |                                         |
| BR <sub>diff</sub>                            | 4 (4)              | 4 (2)                           | 4 (4)                                   |
| HR <sub>diff</sub>                            | 21 (24)            | 26.5 (21)                       | 3 (14)                                  |
| SBP <sub>diff</sub>                           | 10 (13)            | 8 (12)                          | 10 (10)                                 |
| DBP <sub>diff</sub>                           | 0 (12)             | 2 (10)                          | 0 (4)                                   |
| Borg Scale <sub>diff</sub> <sup>1</sup>       |                    |                                 |                                         |
| Dyspnea                                       | 2 (3)              | 2 (2)                           | 4 (4)                                   |
| Fatigue                                       | 2 (3)              | 2 (3)                           | 4 (4)                                   |
| Walk Distance (m)                             | 378.9 (59.8)       | 358.8 (52.4)                    | 329.9 (87.4)                            |
| <b>Secondary</b>                              |                    |                                 |                                         |
| Body weight (Kg)                              | 85.1 (12.9)        | 81.3 (12.3)                     | 86.2 (13.0)                             |
| BMI (Kg/cm <sup>2</sup> )                     | 33.4 (3.4)         | 33.6 (3.0)                      | 33.9 (3.1)                              |
| Waist circumference (cm)                      | 104.2 (9.7)        | 100.5 (9.8)                     | 103.5 (10.1)                            |
| Heart rate                                    | 74.7 (9.5)         | 74 (7.8)                        | 75.9 (8.7)                              |
| Blood pressure (mmHg)                         |                    |                                 |                                         |
| SBP                                           | 108.1 (8.9)        | 105.8 (8.6)                     | 110.2 (7.4)                             |
| DBP                                           | 65.9 (8.2)         | 61.9 (10.5)                     | 71.2 (7.4)                              |
| Quality of Life                               |                    |                                 |                                         |
| Physical fitness                              | 3 (1.0)            | 2.6 (0.7)                       | 2.9 (0.9)                               |
| Feelings                                      | 2.7 (1.4)          | 3.2 (1.3)                       | 3 (1.3)                                 |
| Daily activities                              | 1.7 (0.9)          | 1.8 (1.2)                       | 2 (1.1)                                 |
| Social activities                             | 1.5 (1.0)          | 2.1 (1.7)                       | 2 (1.4)                                 |
| Change in health                              | 2.7 (0.8)          | 2.4 (0.8)                       | 2.7 (1.2)                               |
| Overall health                                | 3.6 (0.8)          | 3.4 (1.0)                       | 3.3 (1.1)                               |

Note: DBP, diastolic blood pressure (mmHg); SBP, systolic blood pressure (mmHg); BR, breathing rate (breaths per minute), HR, heart rate (beats per minute)

<sup>1</sup> Medians and interquartile range are shown
