# Supplementary material for: Pilot Feasibility Assessment of a Tailored Physical Activity Prescription in Overweight and Obese People in a Public Hospital
Source: MDPI journal article supplement (doi:10.3390/ijerph191710774), 2022-08-30
Supplement: s1 [file s1]

**Table S1.** Phases for physical activity prescription

| Phase        | Frequency and Duration                                                                                                          | Description                                                                                                                    |
|--------------|---------------------------------------------------------------------------------------------------------------------------------|--------------------------------------------------------------------------------------------------------------------------------|
| Warming-up   | 5 – 10 minutes                                                                                                                  | Sequence of movements to activate the parts of the body to be exercised                                                        |
| Conditioning | 30 minutes of <b>moderate intensity exercise</b> x 5 days/week                                                                  | Includes aerobic exercises to improve cardiorespiratory function, and muscular strength exercises to improve muscular function |
|              | 20 minutes of <b>vigorous intensity exercise</b> x 3 days/week                                                                  |                                                                                                                                |
|              | 30 minutes of <b>moderate intensity exercise</b> x 2 days/week + 20 minutes of <b>vigorous intensity exercise</b> x 2 days/week |                                                                                                                                |
| Cooling      | 5 – 10 minutes                                                                                                                  | Low-intensity exercise to restore heart function and blood pressure                                                            |
| Stretching   | 5 – 10 minutes                                                                                                                  | Exercises to improve muscle and tendon range of motion, postural stability and balance                                         |
