# Supplementary material for: Pilot Feasibility Assessment of a Tailored Physical Activity Prescription in Overweight and Obese People in a Public Hospital
Source: MDPI journal article supplement (doi:10.3390/ijerph191710774), 2022-08-30
Supplement: s1 [file s1]

**Table S3.** Changes in primary and secondary clinical outcomes sixth and twelfth weeks compared with the baseline in a crude model

| Outcome measure                  | Crude Model              |          |                              |                      |
|----------------------------------|--------------------------|----------|------------------------------|----------------------|
|                                  | Follow-up ( 6th week)    |          | Final evaluation (12th week) |                      |
|                                  | Coef. (IC 95%)           | p-value* | Coef. (IC 95%)               | p-value <sup>1</sup> |
| <b>Primary</b>                   |                          |          |                              |                      |
| Physical Activity (MET-min/week) |                          |          |                              |                      |
| Walking                          | -505.2 (-1566.3 - 556.0) | 0.351    | 813.2 (-137.0 - 1763.5)      | 0.093                |
| Moderate Intensity               | -619.1 (-1491.3 - 253.1) | 0.164    | 892.3 (-10.2 - 1794.9)       | 0.053                |
| Vigorous Intensity               | 2290.7 (278.5 - 4302.9)  | 0.026    | 790.8 (-250.8 - 1832.5)      | 0.137                |
| Sitting time (hours/day)         | -0.2 (-1.2 - 0.76)       | 0.664    | 0.1 (-1.4 -1.7)              | 0.877                |
| Six minutes' walk test           |                          |          |                              |                      |
| BR diff                          | -1.6 (-3.1 - -0.2)       | 0.029    | -1.1 (-3.1 - 0.8)            | 0.253                |
| HR diff                          | -6.4 (-15.5 - 2.7)       | 0.17     | -21.4 (-29.9 - -12.9)        | 0.001                |
| SBP diff                         | -2.6 (-7.9 - 2.7)        | 0.332    | -0.4 (-7.0 - 6.1)            | 0.898                |
| DBP diff                         | 1.9 (-3.9 - 7.7)         | 0.527    | -3.9 (-8.4 - 0.6)            | 0.092                |
| Borg Scale diff                  |                          |          |                              |                      |
| Dyspnea                          | -0.5 (-1.8 - 0.8)        | 0.46     | 1.3 (-0.8 - 3.4)             | 0.228                |
| Fatigue                          | 0.1 (-1.6 - 1.9)         | 0.877    | 1.5 (-0.2 - 3.3)             | 0.084                |
| Walk Distance (m)                | -19.5 (-57.8 - 18.9)     | 0.319    | -48.4 (-90.5 - -6.4)         | 0.024                |
| <b>Secondary</b>                 |                          |          |                              |                      |
| Body weight (Kg)                 | 0.2 (-0.6 - 1.1)         | 0.572    | -0.2 (-1.4 - 0.9)            | 0.689                |
| BMI (Kg/cm2)                     | 0.1 (-0.2 - 0.5)         | 0.396    | -0.1 (-0.6 - 0.5)            | 0.699                |
| Waist circumference (cm)         | -1.1 (-2.8 - 0.6)        | 0.205    | -1.6 (-3.2 - 0.03)           | 0.055                |
| Heart rate                       | 0.9 (-4.1 - 6.0)         | 0.713    | 0.4 (-3.4 - 4.3)             | 0.817                |
| Blood pressure (mmHg)            |                          |          |                              |                      |
| SBP                              | -0.6 (-4.8 - 3.5)        | 0.761    | 0.5 (-3.0 - 4.0)             | 0.760                |
| DBP                              | -3.9 (-10.4 - 2.5)       | 0.234    | 5.0 (1.6 - 8.4)              | 0.004                |
| Quality of Life                  |                          |          |                              |                      |
| Physical fitness                 | -0.2 (-0.5 - 0.4)        | 0.335    | -0.04 (-0.5 - 0.4)           | 0.859                |
| Feelings                         | 0.6 (0.03 - 1.2)         | 0.04     | 0.3 (-0.3 - 0.9)             | 0.339                |
| Daily activities                 | 0.1 (-0.5 - 0.7)         | 0.735    | 0.3 (-0.2 - 0.9)             | 0.206                |
| Social activities                | 0.6 (-0.1 - 1.3)         | 0.114    | 0.4 (-0.2 - 0.9)             | 0.212                |
| Change in health                 | -0.5 (-1.0 - 0.6)        | 0.081    | 0.1 (-0.5 - 0.6)             | 0.858                |
| Overall health                   | -0.2 (-0.8 - 0.3)        | 0.446    | -0.3 (-0.8 - 0.2)            | 0.209                |

<sup>1</sup> p-value = 0.025 using Bonferroni correction
